# Supplementary material
Source: publisher figshare collection journal article supplement (https://sage.figshare.com/ndownloader/files/17417726)
Supplement: Supplementary file 1 [file 17417726]

## Appendix

Appendix Table 1. The Twelve RXCs Included in the 2018 HHS-HCC Model.

| Prescription Drug Category (RXC)                   | Use                     | Condition                                                   |
|----------------------------------------------------|-------------------------|-------------------------------------------------------------|
| Anti-HIV agents                                    | Imputation and severity | HIV                                                         |
| Anti-hepatitis c (HCV) agents                      | Imputation and severity | Hepatitis C                                                 |
| Antiarrhythmics                                    | Imputation and severity | Heart arrhythmia                                            |
| Phosphate binders                                  | Imputation and severity | Chronic kidney disease                                      |
| Inflammatory bowel disease agents                  | Imputation and severity | Inflammatory bowel disease                                  |
| Insulin                                            | Imputation and severity | Diabetes                                                    |
| Anti-diabetic agents, except insulin and metformin | Imputation and severity | Diabetes                                                    |
| Multiple sclerosis agents                          | Imputation and severity | Multiple Sclerosis                                          |
| Immune suppressants and immunomodulators           | Imputation and severity | Inflammatory bowel disease, rheumatoid arthritis, and lupus |
| Cystic fibrosis agents                             | Imputation and severity | Cystic fibrosis                                             |
| Ammonia detoxicants                                | Severity-only           | N/A                                                         |
| Diuretics, loop and select potassium-sparing       | Severity-only           | N/A                                                         |

Source: HHS Notice of Benefit and Payment Parameters for 2018 (CMS, 2016c).

Notes: The last two RXCs were excluded from our analyses.

Appendix Table 2. Comparison of Risk Score Increases under the 2017 and the 2018 HHS-HCC Models for an Enrollee in Various Scenarios.

|                  | HIV        |            | Multiple Sclerosis |            |
|------------------|------------|------------|--------------------|------------|
|                  | 2017 Model | 2018 Model | 2017 Model         | 2018 Model |
| HCC only         | 8.450      | 0.409      | 13.194             | 6.087      |
| RXC only         | N/A        | 6.050      | N/A                | 16.192     |
| Both HCC and RXC | 8.450      | 8.862      | 13.194             | 19.105     |

Source: HHS Notices of benefit and payment parameters for benefit years 2017 and 2018 (CMS, 2016b; CMS, 2016c).

Notes: This table uses HIV and multiple sclerosis as two examples to illustrate risk score increases in various scenarios for a gold plan enrollee. Under the 2018 HHS-HCC model, an individual with both the HCC and the RXC receives an additional interaction term, whose coefficient can be either positive or negative. In the case of HIV, the score of the interaction term is 2.403, and thus under the 2018 model, an individual with both the HCC and the RXC receives a score of 8.862 ( $0.409+6.050+2.403$ ). The case of multiple sclerosis is similar, except that the interaction term has a negative coefficient ( $-3.174$ ).

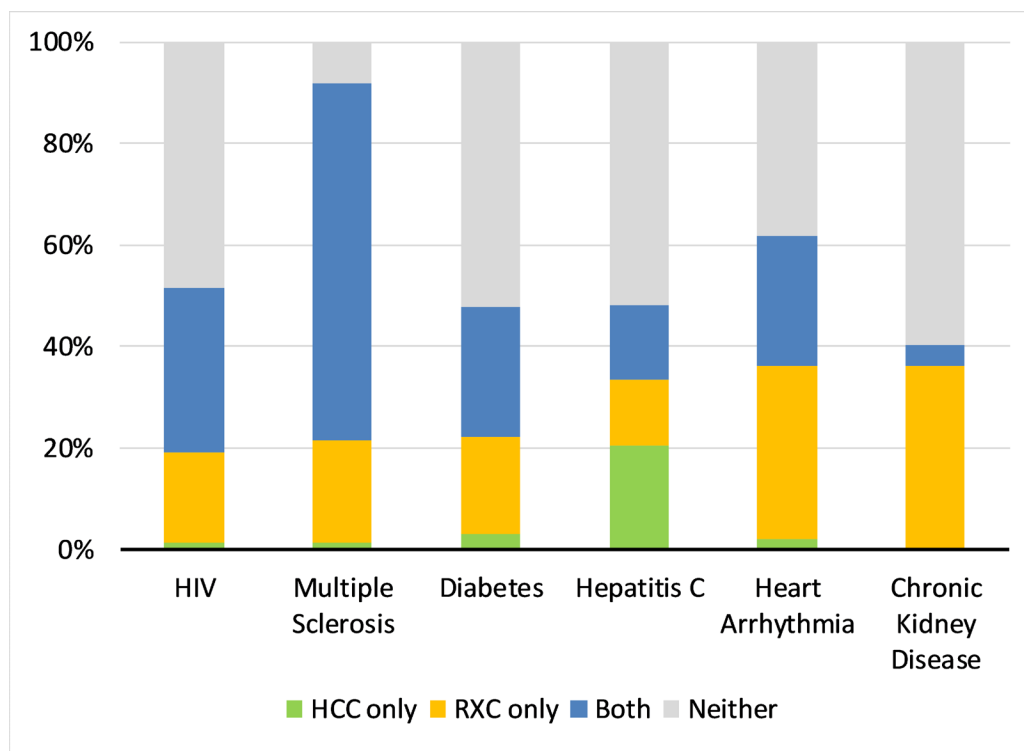

Appendix Figure 1. RXC-only patients' status in the previous year (2016).

Source: Authors' analysis of the 2016 and 2017 member information file, medical claims, and pharmacy claims from the Optum data.

Notes: The sample includes enrollees with any of the six conditions who in 2017 only had the associated prescription drug categories (RXC) and who continuously enrolled in plans offered by the insurer in both 2016 and 2017. HCC stands for hierarchical condition category.

Appendix Table 3. Partial-year Enrollees Who Would Have Received RXCs and Who Would Not under the 2018 HHS-HCC Model.

|                                      | Months Enrolled |           |           |         | Full-Year Enrollees |
|--------------------------------------|-----------------|-----------|-----------|---------|---------------------|
|                                      | 1-3             | 4-6       | 7-9       | 10-11   |                     |
| 0 HCCs                               | 93.15%          | 87.33%    | 81.96%    | 82.24%  | 79.62%              |
| 0 HCC and only unassociated RXC(s)   | 0.79%           | 0.58%     | 0.45%     | 0.36%   | 0.34%               |
| 1 HCC                                | 4.12%           | 7.87%     | 10.81%    | 10.98%  | 12.39%              |
| 1 HCC and only associated RXC(s)     | 0.80%           | 1.75%     | 2.75%     | 2.27%   | 2.83%               |
| 1 HCC and only unassociated RXC(s)   | 0.04%           | 0.07%     | 0.10%     | 0.10%   | 0.12%               |
| 2 HCCs                               | 0.57%           | 1.20%     | 1.86%     | 1.99%   | 2.31%               |
| 2 HCCs and only associated RXC(s)    | 0.17%           | 0.42%     | 0.78%     | 0.67%   | 0.87%               |
| 2 HCCs and only unassociated RXC(s)  | 0.01%           | 0.01%     | 0.02%     | 0.02%   | 0.03%               |
| 3+ HCCs                              | 0.25%           | 0.51%     | 0.77%     | 0.86%   | 0.92%               |
| 3+ HCCs and only associated RXC(s)   | 0.08%           | 0.23%     | 0.46%     | 0.46%   | 0.52%               |
| 3+ HCCs and only unassociated RXC(s) | 0.00%           | 0.01%     | 0.02%     | 0.02%   | 0.02%               |
| N                                    | 1,147,274       | 1,018,063 | 1,117,051 | 454,150 | 5,162,983           |

Source: Authors' analysis of the 2017 member information file, medical claims, and pharmacy claims from the Optum data.

Notes: The sample includes commercially insured partial-year enrollees ages 21 to 64 that did not switch plans in 2017. A hierarchical condition category (HCC) Group was counted as one single HCC. The two severity-only prescription drug categories (RXC(s)) were excluded from the analysis. Individuals with “associated RXC(s)” were those taking medications in RXC(s) associated with the HCC(s) they already had. Individuals with “unassociated RXC(s)” were those taking medications in RXC(s) not associated with the HCC(s) they had. By definition, individuals with zero HCCs did not receive associated RXCs. Enrollee subgroups with both associated and unassociated RXCs were excluded due to small group size.

Appendix Table 4. Mean Age by Level of Plan Spending of Enrollees with 0 HCCs Only under the 2018 HHS-HCC Model.

|                                         | Men  | Women | N         | % Women |
|-----------------------------------------|------|-------|-----------|---------|
| Plan spending=0                         | 38.0 | 39.9  | 1,032,168 | 30%     |
| Plan spending between 0 and \$500       | 40.8 | 40.6  | 1,292,949 | 41%     |
| Plan spending between \$500 and \$2,000 | 43.6 | 42.1  | 948,027   | 62%     |
| Plan spending greater than \$2,000      | 45.5 | 44.3  | 837,731   | 58%     |

Source: Authors' analysis of the 2017 member information file, medical claims, and pharmacy claims from the Optum data.

Notes: The sample includes enrollees with 0 HCCs only under the 2018 HHS-HCC Model. All spending is in 2017 dollars.

Appendix Table 5. Top 15 Diagnoses by Share of Patients for Enrollees with 0 HCCs Only under the 2018 HHS-HCC Model.

| All Enrollees with 0 HCCs Only                                                        |        |                | Enrollees with 0 HCCs Only and with Plan Spending >\$2,000                            |        |                |
|---------------------------------------------------------------------------------------|--------|----------------|---------------------------------------------------------------------------------------|--------|----------------|
| Diagnosis                                                                             | ICD-10 | % With this Dx | Diagnosis                                                                             | ICD-10 | % With this Dx |
| No diagnosis (includes those with no medical claims)                                  | N/A    | 28%            | Encounter for general adult medical examination without abnormal findings             | Z0000  | 33%            |
| Encounter for general adult medical examination without abnormal findings             | Z0000  | 22%            | Encounter for gynecological examination (general) (routine) without abnormal findings | Z01419 | 24%            |
| Encounter for gynecological examination (general) (routine) without abnormal findings | Z01419 | 14%            | Essential (primary) hypertension                                                      | I10    | 22%            |
| Essential (primary) hypertension                                                      | I10    | 11%            | Encounter for immunization                                                            | Z23    | 15%            |
| Encounter for immunization                                                            | Z23    | 9%             | Lower back pain                                                                       | M545   | 14%            |
| Lower back pain                                                                       | M545   | 6%             | Encounter for screening for malignant neoplasm of colon                               | Z1211  | 13%            |
| Acute upper respiratory infection, unspecified                                        | J069   | 6%             | Hyperlipidemia, unspecified                                                           | E785   | 11%            |
| Hyperlipidemia, unspecified                                                           | E785   | 5%             | Gastro-esophageal reflux disease without esophagitis                                  | K219   | 11%            |
| Acute pharyngitis, unspecified                                                        | J029   | 5%             | Neck pain                                                                             | M542   | 10%            |
| Cough                                                                                 | R05    | 5%             | Anxiety disorder, unspecified                                                         | F419   | 9%             |
| Encounter for screening for malignant neoplasm of colon                               | Z1211  | 4%             | Acute upper respiratory infection, unspecified                                        | J069   | 9%             |
| Other fatigue                                                                         | R5383  | 4%             | Cough                                                                                 | R05    | 9%             |
| Anxiety disorder, unspecified                                                         | F419   | 4%             | Other fatigue                                                                         | R5383  | 9%             |
| Gastro-esophageal reflux disease without esophagitis                                  | K219   | 4%             | Vitamin D deficiency, unspecified                                                     | E559   | 8%             |
| Vitamin D deficiency, unspecified                                                     | E559   | 4%             | Acute pharyngitis, unspecified                                                        | J029   | 8%             |

Source: Authors' analysis of the 2017 member information file, medical claims, and pharmacy claims from the Optum data.

Notes: The sample includes enrollees with 0 HCCs only under the 2018 HHS-HCC Model.

Appendix Table 6. Comparison of Sample Characteristics of the Study Sample and the Adult Calibration Sample for the 2014 HHS-HCC Model.

|                | Study Sample | Calibration Sample |
|----------------|--------------|--------------------|
| Men 21 to 24   | 4.2%         | 3.8%               |
| Men 25 to 29   | 5.4%         | 4.3%               |
| Men 30 to 34   | 6.2%         | 4.8%               |
| Men 35 to 39   | 6.4%         | 5.2%               |
| Men 40 to 44   | 6.0%         | 5.6%               |
| Men 45 to 49   | 6.3%         | 6.0%               |
| Men 50 to 54   | 6.1%         | 6.2%               |
| Men 55 to 59   | 5.9%         | 5.8%               |
| Men 60+        | 4.8%         | 5.8%               |
| Women 21 to 24 | 3.9%         | 4.0%               |
| Women 25 to 29 | 4.9%         | 4.7%               |
| Women 30 to 34 | 5.7%         | 5.3%               |
| Women 35 to 39 | 6.0%         | 5.6%               |
| Women 40 to 44 | 5.6%         | 6.1%               |
| Women 45 to 49 | 6.0%         | 6.7%               |
| Women 50 to 54 | 5.9%         | 7.0%               |
| Women 55 to 59 | 5.8%         | 6.5%               |
| Women 60+      | 4.6%         | 6.5%               |
| With 0 HCCs    | 80.0%        | 80.8%              |
| With 1 HCC     | 15.3%        | 15.2%              |
| With 2+ HCCs   | 4.7%         | 4.0%               |
| N              | 5,162,983    | 14,220,503         |

Source: The study sample column is from authors' analysis of the 2017 member information file, medical claims, and pharmacy claims from the Optum data. The calibration sample column is reported in Kautter et al. (2014).

Notes: The sample includes commercially insured enrollees ages 21 to 64 that enrolled for the full year and did not switch plans in 2017. A hierarchical condition category (HCC) Group was counted as one single HCC.
